# Supplementary material
Source: PubMed Central journal article supplement (PMC2579990)
Supplement: NIHMS62063-supplement-si20070105_052.pdf [file NIHMS62063-supplement-si20070105_052.pdf]

# Supporting Information

## The Glycopeptide Antitumor Antibiotic Zorbamycin from *Streptomyces flavoviridis* ATCC21892: Strain Improvement and Structure Elucidation<sup>‡</sup>

*Liyan Wang,<sup>†</sup> Bong-Sik Yun,<sup>†</sup> Nicholas P. George,<sup>‡</sup> Evelyn Wendt-Pienkowski,<sup>†</sup> Ute Galm,<sup>†</sup> Tae-Jin Oh,<sup>†</sup> Jane M. Coughlin,<sup>§</sup> Guodong Zhang,<sup>†</sup> Meifeng Tao,<sup>†</sup> and Ben Shen<sup>\*†,‡,§,||</sup>*

Division of Pharmaceutical Sciences, Microbiology Doctoral Training Program, University of Wisconsin National Cooperative Drug Discovery Group, and Department of Chemistry, University of Wisconsin-Madison, Madison, WI 53705

<sup>‡</sup> Dedicated to the late Dr. Kenneth L. Rinehart, of the University of Illinois at Urbana-Champaign, for his pioneering work on bioactive natural products.

\* To whom correspondence should be addressed: Tel: (608) 263-2673. Fax: (608) 262-5345. E-mail: [bshen@pharmacy.wisc.edu](mailto:bshen@pharmacy.wisc.edu).

<sup>†</sup> Division of Pharmaceutical Sciences.

<sup>‡</sup> Microbiology Doctoral Training Program.

<sup>§</sup> Department of Chemistry.

<sup>||</sup> University of Wisconsin National Cooperative Drug Discovery Group.

## Table of Contents

**Table S1.** UV-irradiation Time and *S. flavoviridis* ATCC21892 Spore Viability.

**Figure S1.** Screening for high-producing mutant strains of **1** upon UV irradiation of the wild-type *S. flavoviridis* ATCC21892 strain by bioassays against *M. smegmatis*.

**Figure S2.** The standard curve for **4** against *M. smegmatis* by the paper disk bioassay.

## References

**Table S1.** UV-irradiation Time and *S. flavoviridis* ATCC21892 Spore Viability.

A spore stock solution (1 mL with  $\sim 10^3$  spores) of *S. flavoviridis* ATCC21892 was exposed to UV irradiation (254 nm) at a distance of 12 cm for different time periods according to a standard literature protocol.<sup>1</sup> The colonized spores (living spores) were counted after incubation at 30 °C for 10 days. The most appropriate irradiation time was determined to be 4 to 5 min by the viability rate of 0.1% to 1%.

| irradiation time (min) | colony number | viability (%) |
|------------------------|---------------|---------------|
| 0                      | 1000          | 100           |
| 0.5                    | 1000          | 100           |
| 1                      | 700           | 70            |
| 2                      | 140           | 14            |
| 3                      | 19            | 1.9           |
| 4                      | 8             | 0.8           |
| 5                      | 4             | 0.4           |
| 10                     | 0             | 0             |

**Figure S1.** Screening for high-producing strains of **1** upon UV irradiation of the wild-type *S. flavoviridis* ATCC21892 strain by bioassays against *M. smegmatis*. (I). Colonies showing different spore colors and morphology after UV irradiation were picked and inoculated into 96-well plates on agar medium (1.5% glucose, 1.5% starch, 2.0% soybean meal, 0.5% yeast extract, 0.25% NaCl, 0.32% CaCO<sub>3</sub>, 0.0005% CuSO<sub>4</sub>·5H<sub>2</sub>O, 0.0005% MnCl<sub>2</sub>·4H<sub>2</sub>O, 0.005% ZnSO<sub>4</sub>·7H<sub>2</sub>O, pH 7.4, and 0.7% agar) and then incubated for 8 days. (II) Each of the agar blocks from the 96-well plates was placed on a bioassay plate pre-seeded with *M. smegmatis* to screen for high-producers of **1** with the wild-type *S. flavoviridis* ATCC21892 strain as a control. (1). The wild-type *S. flavoviridis* ATCC21892 strain and (2) the improved *S. flavoviridis* SB9000 strain.

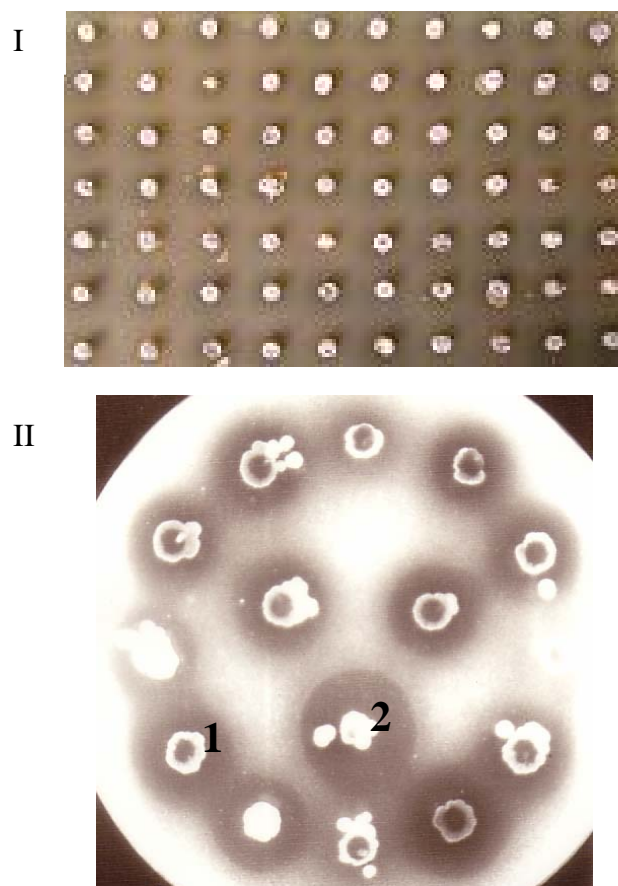

**Figure S2.** The standard curve for **4** against *M. smegmatis* by the paper disk bioassay.

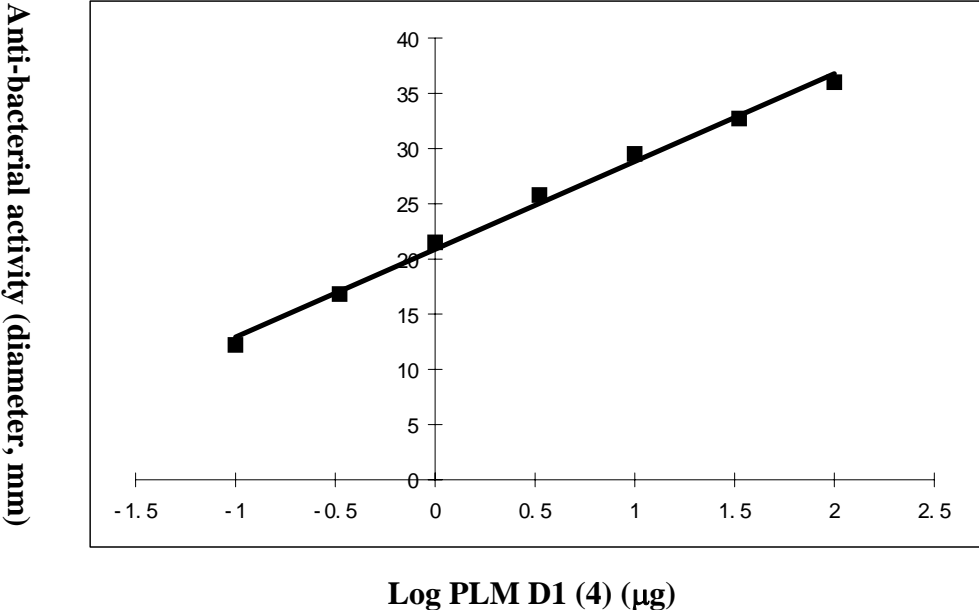

## References and Notes

- (1) Kieser, T.; Bibb, M. J.; Buttner, M. J.; Chater, K. F.; Hopwood, D. A. *Practical Streptomyces Genetics*; The John Innes Foundation: Norwich, UK; 2000, pp 102-103.
- (2) Okuda, T.; Awataguchi, S. Jpn. Tokkyo Koho, JP 47002557, 1972.
- (3) The optimized medium for zorbamycin production was derived from the original production medium in reference 2 by (i) increasing the concentrations of  $\text{CuSO}_4 \cdot 5\text{H}_2\text{O}$  from 0.0005% to 0.01% and of  $\text{ZnSO}_4 \cdot 7\text{H}_2\text{O}$  from 0.005% to 0.05% and (ii) eliminating  $\text{MnCl}_2 \cdot 7\text{H}_2\text{O}$  completely.
